# Supplementary material for: Facilitating cryogenic blue persistent luminescence in a glassy matrix
Source: Royal Society of Chemistry journal article supplement (doi:10.1039/d5mh02028j), 2025-12-17
Supplement: d5mh02028j1.pdf [file d5mh02028j1.pdf]

## **Supporting Information for**

### **Facilitating Cryogenic Blue Persistent Luminescence in a Glassy Matrix**

Hengli Zhu <sup>a</sup>, Jiaren Du <sup>a \*</sup>, Weichang Li <sup>b</sup> and Hengwei Lin <sup>a</sup>

<sup>a</sup> International Joint Research Center for Photo-responsive Molecules and Materials,  
School of Chemical and Material Engineering, Jiangnan University, 214122, Wuxi,  
China

<sup>b</sup> Shanghai Institute of Optics and Fine Mechanics, Chinese Academy of Sciences,  
201800, Shanghai, China

\*Corresponding author:

Dr. Jiaren Du (jiaren.du@jiangnan.edu.cn);

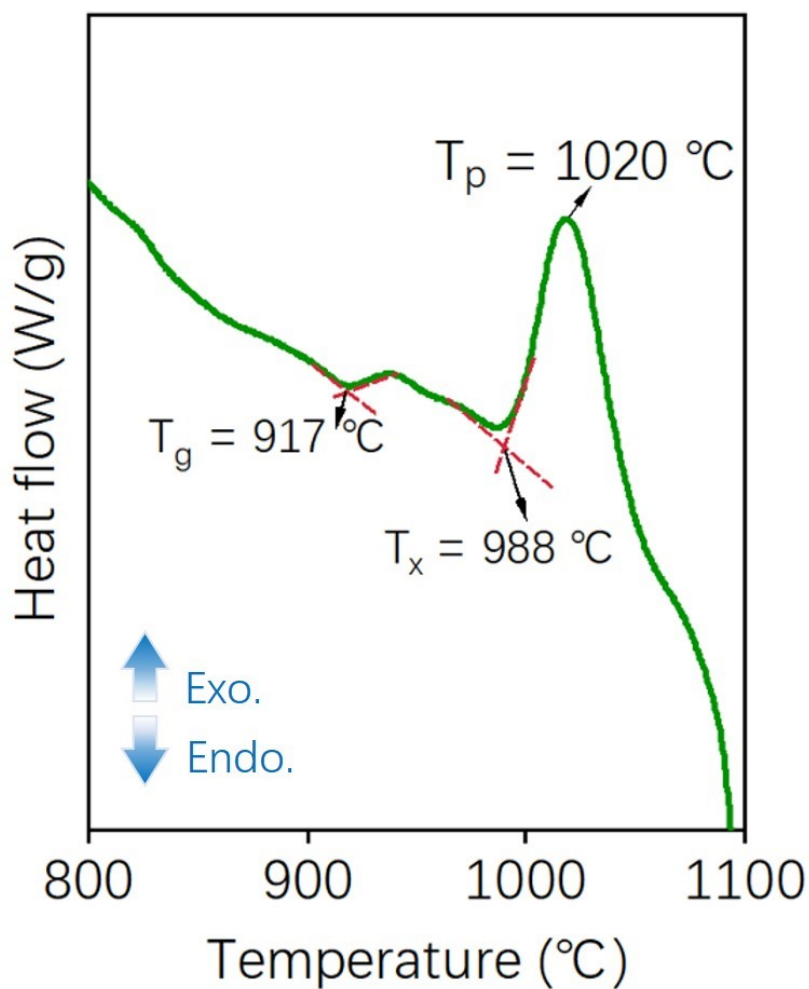

Figure S1. The differential scanning calorimetry (DSC) thermogram recorded the thermodynamic parameters of MAS-Eu glass. Exothermic (Exo.) and endothermic (Endo.) processes were indicated. The glass transition temperature ( $T_g$ ), crystallization initiation temperature ( $T_x$ ), and maximum crystallization temperature ( $T_p$ ) were measured at 917 °C, 988 °C, and 1020 °C, respectively.

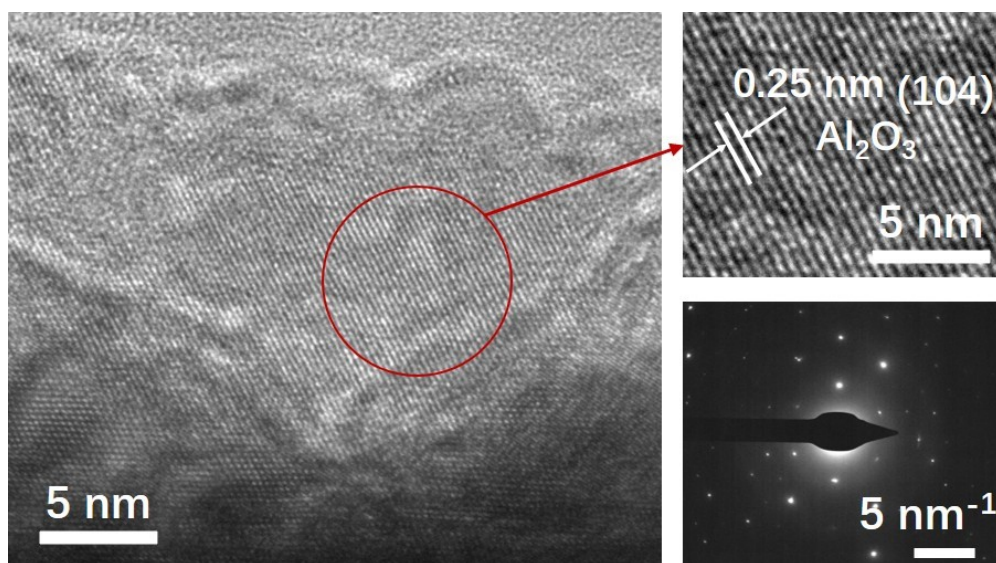

Figure S2. The detailed HRTEM image of MAS-Eu. The scale bar is 5 nm. The measured interplanar spacing is 0.25 nm, corresponding to the Al<sub>2</sub>O<sub>3</sub> (104) plane.

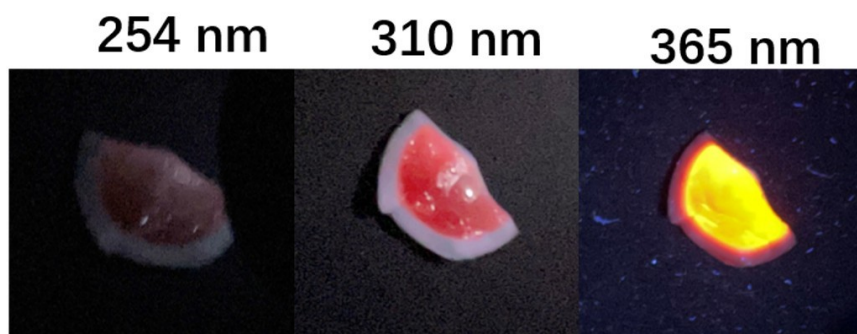

Figure S3. Photographs of the glassy specimen MAS-Sm illuminated by various wavelengths (254 nm, 310 nm, and 365 nm).

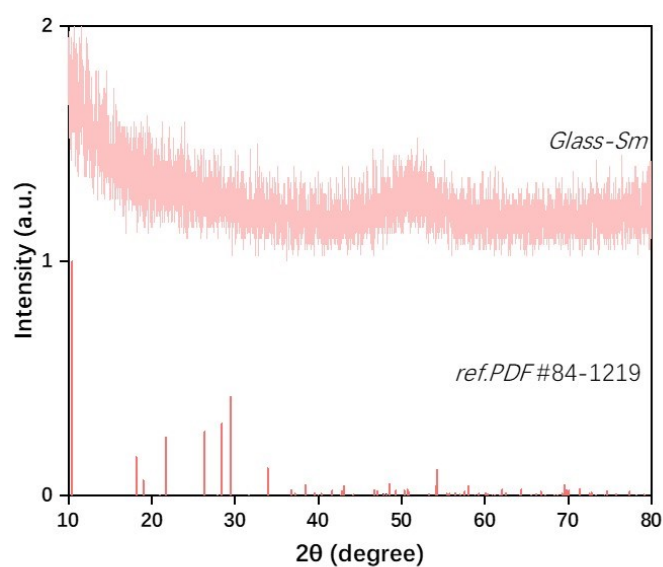

Figure S4. The XRD pattern of MAS-Sm synthesized at 1000 W for a duration of 30 minutes. The corresponding standard PDF card data of  $\text{Mg}_2\text{Al}_4\text{Si}_5\text{O}_{18}$  (PDF# 084-1219) is included for reference.

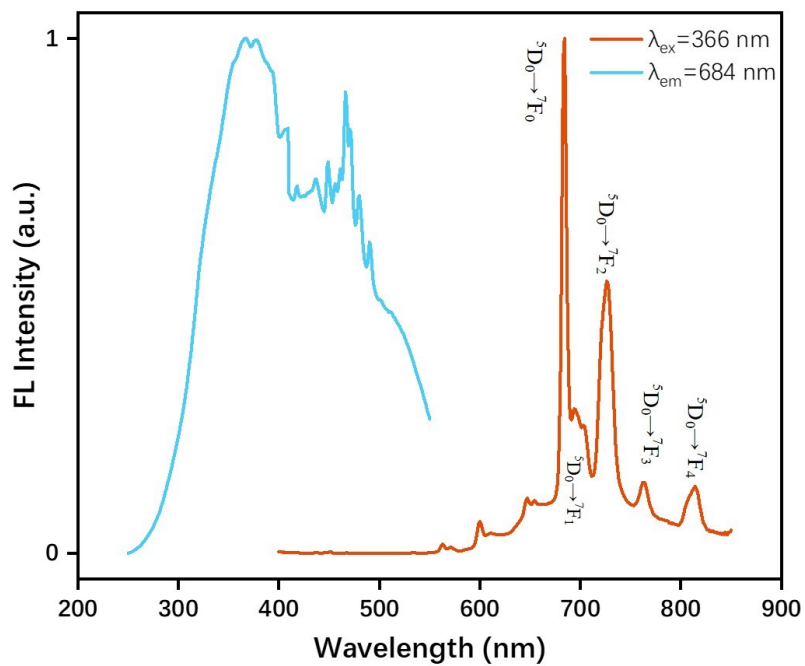

Figure S5. The PLE and PL spectra of the MAS-Sm glass.

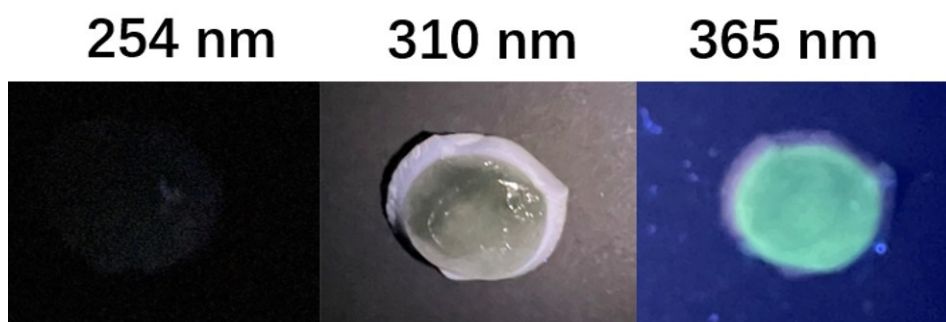

Figure S6. Photographs of the glassy specimen MAS-Tb illuminated by various wavelengths (254 nm, 310 nm, and 365 nm).

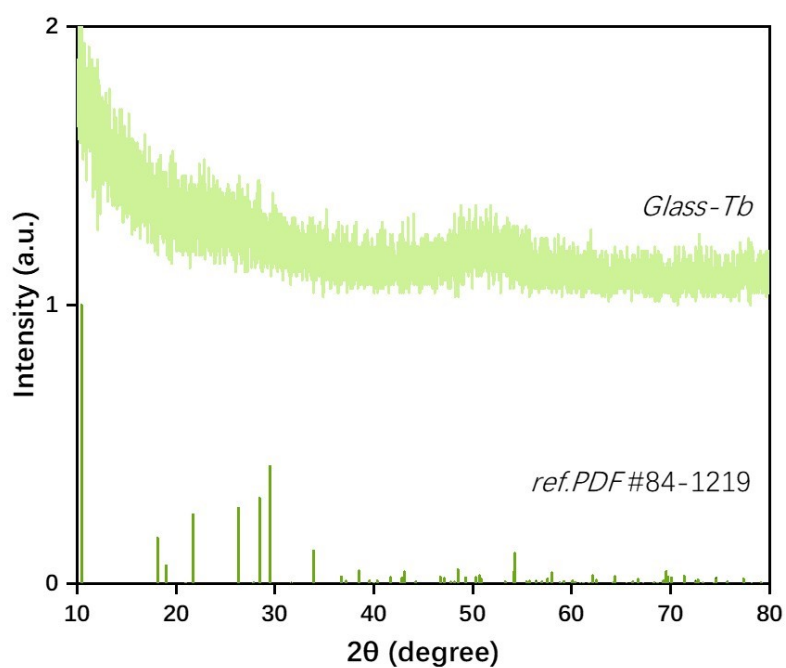

Figure S7. The XRD pattern of MAS-Tb synthesized at 1000 W for a duration of 30 minutes. The corresponding standard PDF card data of  $\text{Mg}_2\text{Al}_4\text{Si}_5\text{O}_{18}$  (PDF# 084-1219) is included for reference.

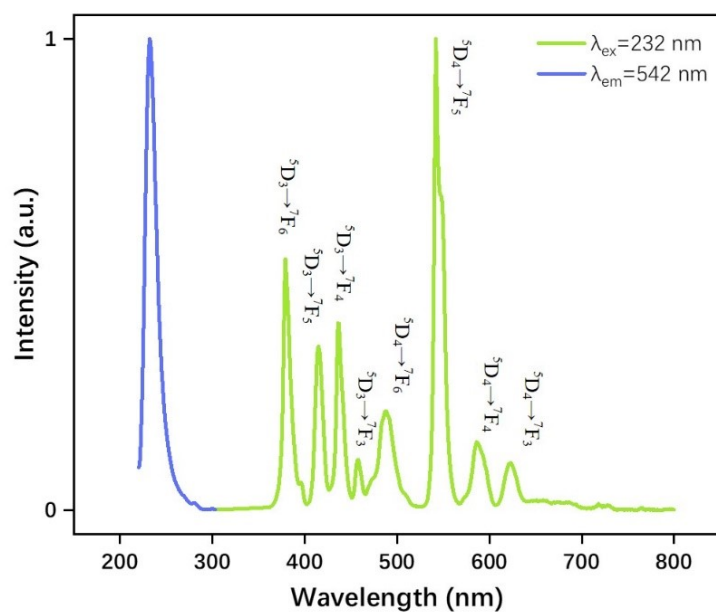

**Figure S8.** The PLE and PL spectra of the MAS-Tb glass.

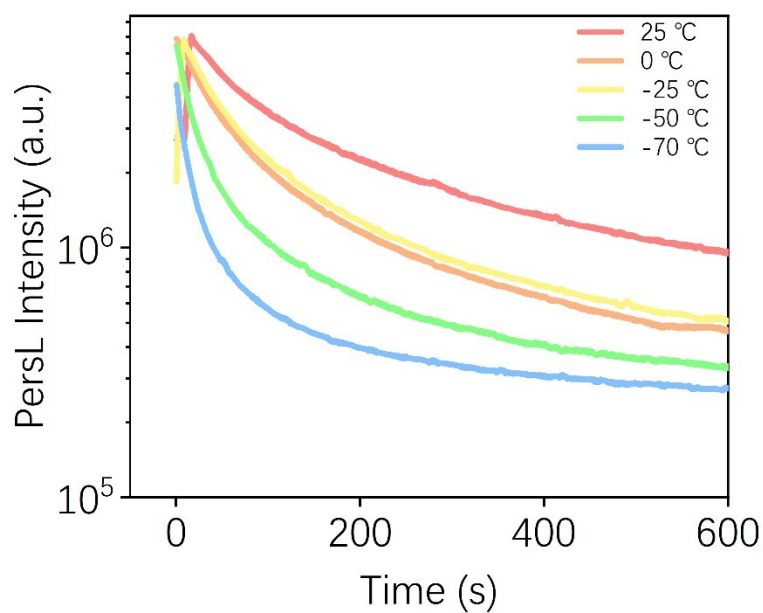

**Figure S9.** The PersL decay curves of the MAS-Eu glass at different ambient temperatures (25, 0, -25, -50 and -70 °C). A 5-min 365 nm charging was conducted at corresponding temperatures.

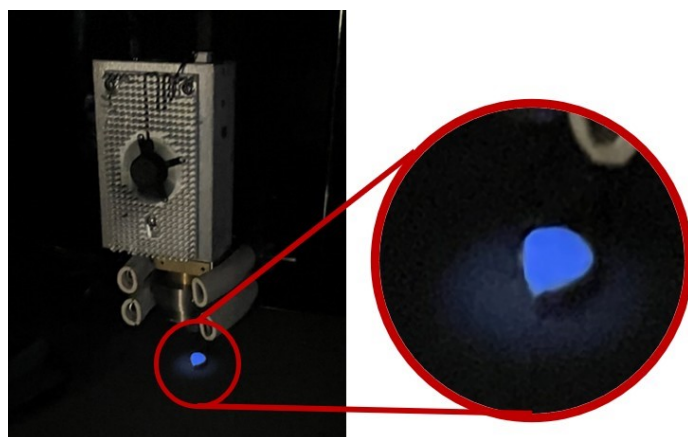

**Figure S10.** X-ray irradiation images of the MAS-Eu glass. The magnified view reveals the blue radioluminescence emitted by the glass.

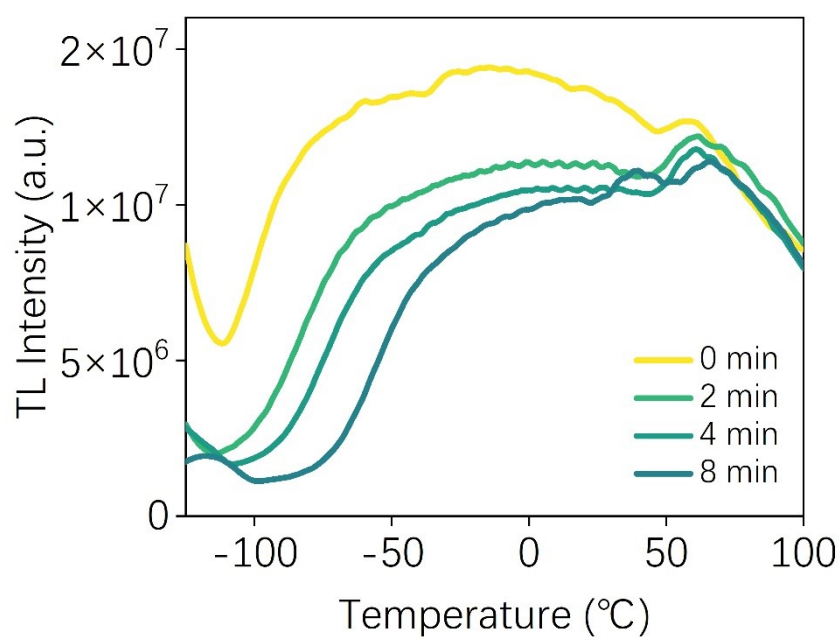

**Figure S11.** TL fading investigations at cryogenic temperatures were performed following a 30-second X-ray irradiation at -125 °C. The fading was assessed over various fading durations (0, 2, 4, and 6 minutes) at -125 °C prior to the acquisition of the TL profiles.

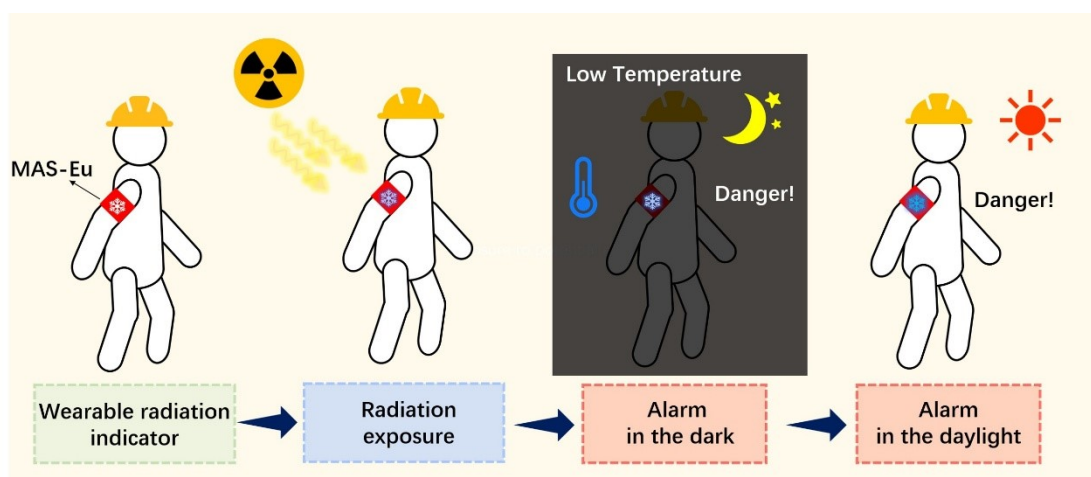

**Figure S12. Schematic representation of MAS-Eu glass for prospective utilization in low-temperature X-ray leakage detection frameworks.**

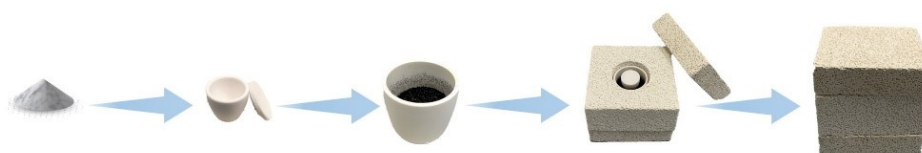

**Figure S13. A schematic representation of the microwave reactor and its synthesis protocol.**
